# Supplementary material for: Assembly of silica aerogels within silica nanofibers: towards a super-insulating flexible hybrid aerogel membrane
Source: Royal Society of Chemistry journal article supplement (doi:10.1039/c5ra18137b), 2015-01-01
Supplement: c5ra18137b1.pdf [file c5ra18137b1.pdf]

## **Assembly of silica aerogels within silica nanofibers: Towards a super-insulating flexible hybrid aerogel membrane**

Hongxia Zheng <sup>a,‡</sup>, Haoru Shan <sup>a,‡</sup>, Xianfeng Wang <sup>a,b,c,\*</sup>, Lifang Liu <sup>a</sup>, Jianyong Yu <sup>c</sup> and Bin

Ding <sup>a,b,c,\*</sup>

<sup>a</sup> Key Laboratory of Textile Science & Technology, Ministry of Education, College of Textiles, Donghua University, Shanghai 201620, China.

<sup>b</sup> State Key Laboratory for Modification of Chemical Fibers and Polymer Materials, College of Materials Science and Engineering, Donghua University, Shanghai 201620, China.

<sup>c</sup> Nanomaterials Research Center, Modern Textile Institute, Donghua University, Shanghai 200051, China

\* Corresponding author: Dr. Xianfeng Wang; Bin Ding (E-mail: wxf@dhu.edu.cn; binding@dhu.edu.cn)

‡ These authors contributed equally to this work.

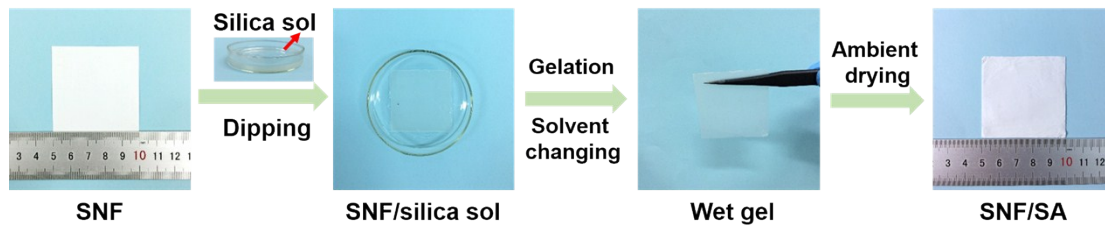

**Fig. S1** Optical images of the preparation of hybrid SNF/SA membranes.

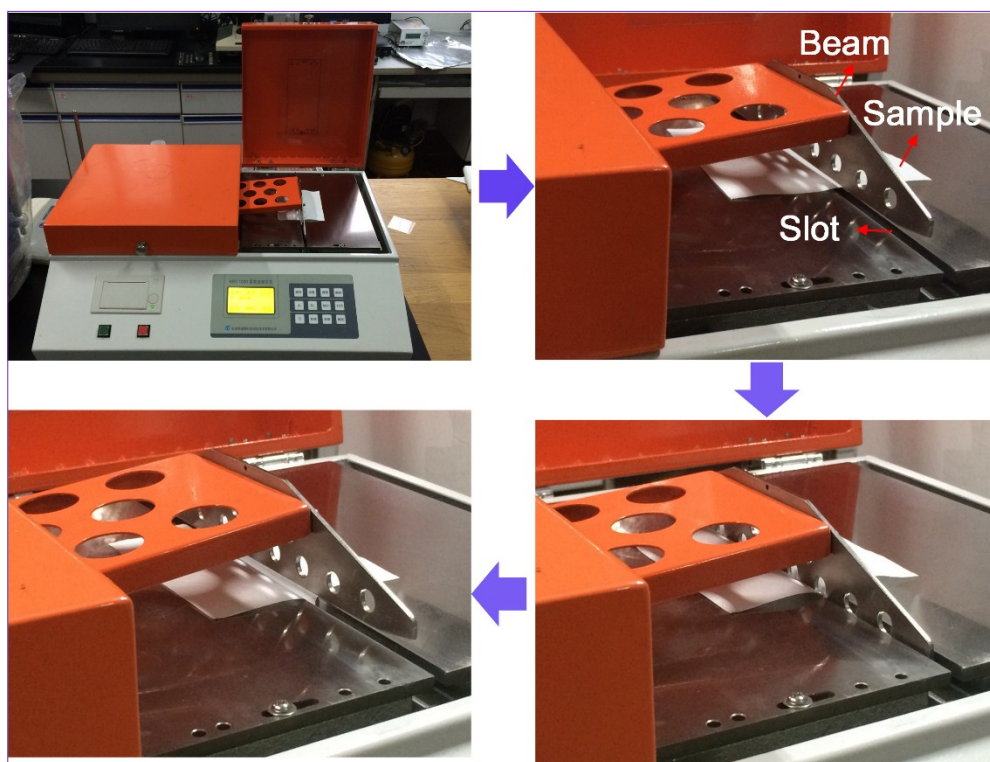

**Fig. S2** Optical images presenting process of the three-point flexural bending test on a softness tester.

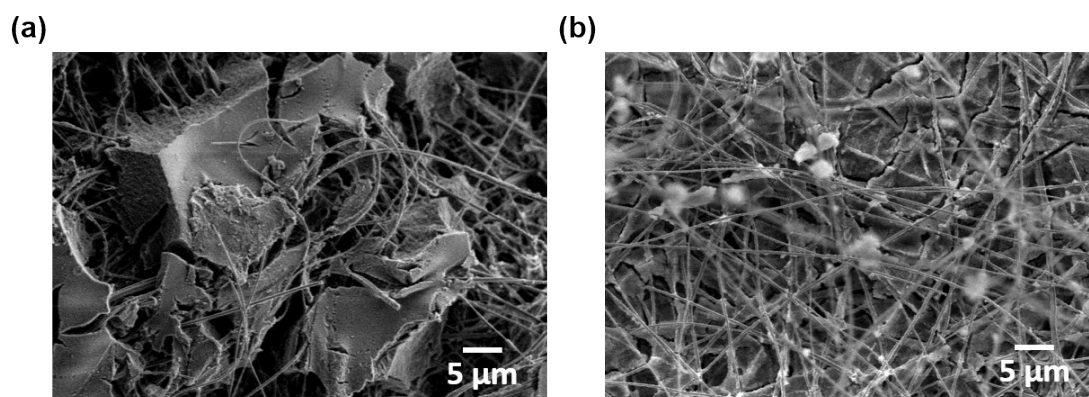

**Fig. S3** FE-SEM images of the as-prepared SNF/SA membranes (a) without TMCS modification, and (b) with TMCS modification.

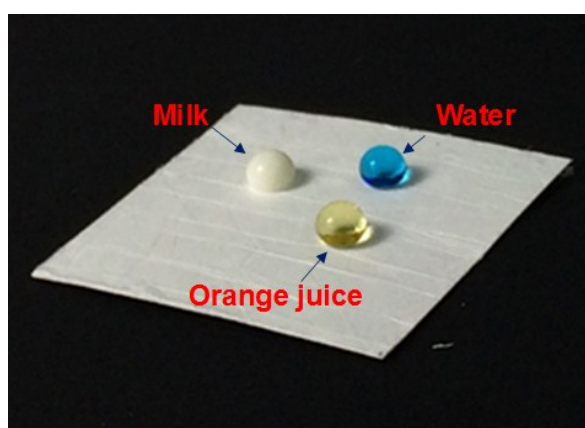

**Fig. S4** Droplets of water, milk and orange juice on a hybrid SNF/SA-4 membrane.

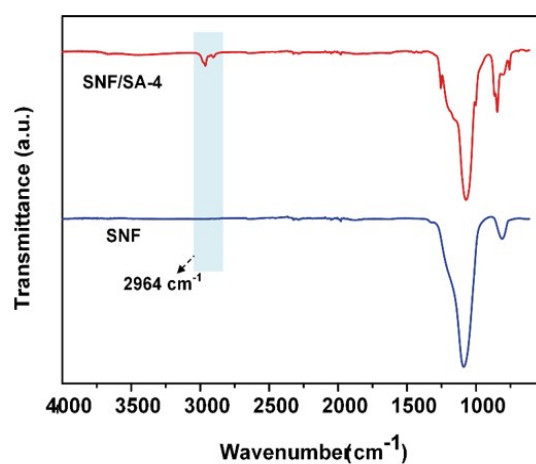

**Fig. S5** FT-IR spectra of SNF, and SNF/SA-4 membranes.
